# Supplementary material
Source: PubMed Central journal article supplement (PMC2898354)
Supplement: supp_M110.118521_jbc.M110.118521-1.pdf [file supp_M110.118521_jbc.M110.118521-1.pdf]

Supplement Fig. 1. Conservation of RGD motif across species. Alignment was achieved using the progressive multiple sequence alignment program, DNASTar/MagAlign. The RGDRGD motifs in NH<sub>2</sub>-propeptides from different species are in bold and boxed. The Gene bank/EMBL accession numbers for the amino acid sequences (in one-letter code) are: human, NM000088; dog, NP571367; chicken, NP989757; horse, AAB05773; rat, NP037061; xenopus, NP989220; Zebrafish, ABC59719.

|           | exon 5            | exon 6         | exon 7            |
|-----------|-------------------|----------------|-------------------|
| human     | GPKGPPGPQGPAGEQGP | <b>RGDRGD</b>  | KGEKGAPGPRGRDGEP  |
| dog       | GPKGPPGPQGPAGEQGP | <b>RGDRGD</b>  | KGEKGAPGPRGRDGEP  |
| horse     | GPKGPPGPQGPAGEQGP | <b>RGDRGD</b>  | KGEKGAPGPRGRDGEP  |
| rat       | GPKGPPGPQGPAGEQGP | <b>RGDRGD</b>  | KG ERGAPGPRGRDGEP |
| chicken   | GPRGPPGPQGPAGEQGQ | <b>RGDRGE</b>  | KGEKGAPGPRGRDGEP  |
| xenopus   | GPRGPPGPQGPSGEQGS | <b>RG ERGD</b> | KGEKGAPGPRGRDGEP  |
| zebrafish | GPRGPAGPMGPPGEQGT | <b>RG ERGA</b> | KGEKGSPGPRGRDGEP  |
